# Supplementary material
Source: publisher site journal article supplement (https://www.dovepress.com/article/458827)
Supplement: Supplementary file 1 [file get_supplementary_file.php]

**Appendix.1: pre-evaluation data collection form:**

Pre-evaluation data collection form was constructed to obtain the primary data collection from medical records of the patients on warfarin therapy, aiming to extract final variables which would be included in the final data collection form (Appendex.1).

**Pre-evaluation data collection form**

1. File No:

2. ID:

3. Gender:

4. Residence:

5. Indication for warfarin:

6. Dose of warfarin:

7. Co – Morbidities:

8. INR values:

9. Medication:

**Appendix.2: Data collection form:**
